# Supplementary material
Source: PubMed Central journal article supplement (PMC3427064)
Supplement: 1204638109_pnas.201204638SI.pdf [file 1204638109_pnas.201204638SI.pdf]

# Supporting Information

Aoki et al. 10.1073/pnas.1204638109

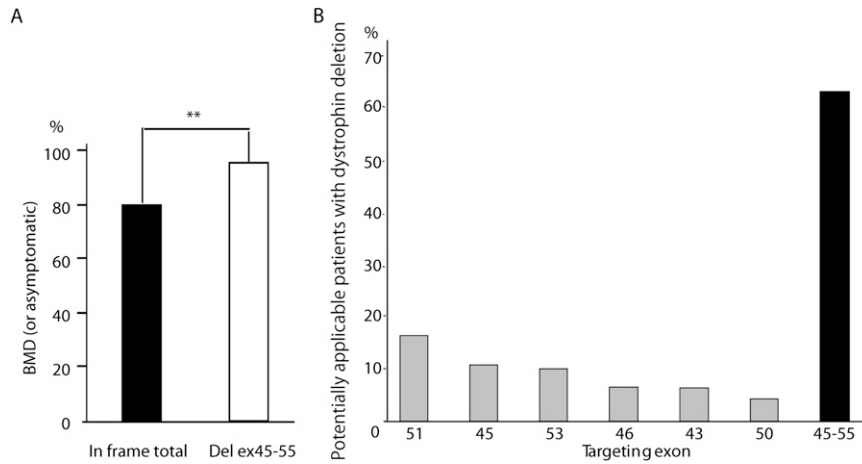

**Fig. S1.** Applicability of antisense-mediated exon skipping targeting each exon and exon 45–55 block skipping. (A) Percentage of DMD or BMD patients with in-frame deletion mutations in the *DMD* gene based on the Leiden database (1). Among 27 patterns of in-frame deletions in the *DMD* mutation hotspot (exons 45–55), deletion exons 45–55 (Del ex45–55) leads to among the mildest phenotype (highest BMD or asymptomatic percentage). The  $\chi^2$  test is used to calculate *P* values.  $**P < 0.01$ . (B) Percentage of applicable patients of the *DMD* deletion mutations with exon-skipping targeting each exon. Applicability of exon-skipping targeting each exon is quite limited with 17% of the *DMD* deletion mutations at most in the case of exon 51 skipping. Exon 45–55 skipping can potentially treat ~63% of them.

1. Aartsma-Rus A, Van Deutekom JC, Fokkema IF, Van Ommen GJ, Den Dunnen JT (2006) Entries in the Leiden Duchenne muscular dystrophy mutation database: An overview of mutation types and paradoxical cases that confirm the reading-frame rule. *Muscle Nerve* 34:135–144.









**Table S1. AO sequences against exons 45–55 of the *Dmd* gene of mice used in this study**

| Name                    | Position | Sequence                          |
|-------------------------|----------|-----------------------------------|
| <b>Mixture-donor</b>    |          |                                   |
| 45Do                    | +7–18    | AAG TCT CTG TCA CCC TAC CTC TTT C |
| 46Do                    | +9–16    | TAA TAA GGG AAA TTA CCT TGA CTT G |
| 47Do                    | +12–13   | GTT AAT ATC TAA CCT TTA TCC ACT G |
| 48Do                    | +7–18    | TAA GCA AGT GGT ACC CAC CTT TAT G |
| 49Do                    | +6–19    | CTA GAG GTT GCT TCA TTA CCT TCA C |
| 50Do                    | +6–19    | TGG GAC AAA ATG TAC TTA CAG GCT C |
| 51Do                    | +10–15   | TTG TTT TAT CCA TAC CTT CTG TTT G |
| 53Do                    | +9–16    | TAT GCT TGA CAC TAA CCT TGG TTT C |
| 54Do                    | +12–13   | AAG TAG TTC TTA CCT TTT ATG AAT G |
| 55Do                    | +5–20    | AGC TGA AAC ACT CAA CTT ACT TGC C |
| <b>Mixture-acceptor</b> |          |                                   |
| 45Ac                    | –19+6    | GAG TTC CTG TAA GCC ATC AGA AGA C |
| 46Ac                    | –17+8    | CTT CAA TCC TGT ATT AAG AAT AAC A |
| 47Ac                    | –17+8    | GCC AGT AAC TGA AAC GGA CAA ATA C |
| 48Ac                    | –15+9    | TCT GGA GAC CTG AAA GGG AAA AAA   |
| 49Ac                    | –5+20    | TGA ACT GTT ACT TCA ATC TCC TGG G |
| 50Ac                    | –10+15   | ATC TTC TAA CTT CCT CTT TAA TAG G |
| 51Ac                    | –18+7    | CTG GCA GCT AGT GTT TTT GAA AGA A |
| 53Ac                    | –11+14   | CTG AAT TCT TTC AAC TGG AAT AAA A |
| 54Ac                    | +5+29    | TGC CGT TGA CGG AGG TCT TTG GCC A |
| 55Ac                    | –18+7    | ACT TAC TCT GCA AAG GGA CAA ACA G |
| <b>Mixture-ESE1</b>     |          |                                   |
| m45-5                   | +6+30    | TTG ACG CTG CCC AAT GCC ATC CTG G |
| m46-26                  | +88+112  | CTG CTC ATC TCC AAG TGG AGT AAT A |
| m47-2                   | +101+125 | TTG AGC TTC TTT TCA AGT TTA TCT T |
| m47-5                   | +63+87   | TAT GGG AGC ACT TAC AAG TAC TGC T |
| m48-6                   | +23+47   | AAG TGA ACC TCA AGC TCT CCT TGT T |
| m49-1                   | +25+49   | AAA GCC TTT CCA CAT CCG CTT GTT T |
| m50-1                   | +11+35   | GCC TCC CAC TCA GAC CTC AGA TCT T |
| m51-1                   | +68+92   | CAA CAG CAA AGA AGA TGG CAT TTC T |
| m53-1                   | +45+69   | CAT TCA ACT GTT GTC TCC TGT TCT G |
| m54-1                   | +21+45   | CAC GTC TAC ACT TAT CTG CCG TTG A |
| m55-5                   | +104+128 | AAG CGT CCT GTA GGA CAT TGG CAG T |
| <b>Mixture-ESE2</b>     |          |                                   |
| 45A                     | +5+29    | TGA CGC TGC CCA ATG CCA TCC TGG A |
| 46A                     | +98+122  | CTT TTA GCT GCT GCT CAT CTC CAA G |
| 47A                     | +22+46   | ATT GTT TTA GAA TTC CCT GGC GCA G |
| 48A                     | –2+23    | TTC TCA GGT AAA GCT CTG GAG ACC T |
| 49A                     | +24+48   | AAG CCT TTC CAC ATC CGC TTG TTT A |
| 50A                     | +48+72   | CTG CTT TGT CCT CAG CTC CCG AAG T |
| 51A                     | +66+90   | ACA GCA AAG AAG ATG GCA TTT CTA G |
| 53A                     | +44+68   | ATT CAA CTG TTG TCT CCT GTT CTG C |
| 54A                     | +23+47   | GCC ACG TCT ACA CTT ATC TGC CGT T |
| 55A                     | +84+108  | GCA GTT GTT TCT GCT TCC GTA ATC C |
